# Supplementary material
Source: PubMed Central journal article supplement (PMC3234495)
Supplement: mmc1.pdf [file mmc1.pdf]

**Table SI.** Summary of miRanda Output of Conserved miRNAs Predicted to Bind linc-MD1, Related to Extended Experimental Procedures

| mir             | Score | Energy | Note |
|-----------------|-------|--------|------|
| mmu-miR-683     | 157   | -24.7  | (1)  |
| mmu-miR-7a      | 156   | -17.12 | (2)  |
| mmu-miR-7b      | 156   | -17.12 | (2)  |
| mmu-miR-3058*   | 153   | -27.35 | (1)  |
| mmu-miR-135a    | 151   | -16.37 |      |
| mmu-miR-135b    | 150   | -16.99 |      |
| mmu-miR-370     | 149   | -21.8  | (2)  |
| mmu-miR-875-5p  | 149   | -16.75 | (1)  |
| mmu-miR-3077*   | 149   | -38.92 | (1)  |
| mmu-miR-135b    | 147   | -18.78 |      |
| mmu-miR-135a    | 146   | -15.4  |      |
| mmu-miR-19b-2*  | 146   | -19.67 | (1)  |
| mmu-miR-216b    | 145   | -18.65 | (1)  |
| mmu-miR-3084*   | 145   | -13.48 | (1)  |
| mmu-miR-450a-2* | 145   | -18.26 | (1)  |
| mmu-miR-133b    | 144   | -21.87 |      |
| mmu-miR-133a    | 144   | -21.13 |      |
| mmu-miR-320     | 144   | -9.38  | (2)  |
| mmu-miR-707     | 144   | -20.44 | (1)  |
| mmu-miR-511-5p  | 143   | -21.78 | (1)  |
| mmu-miR-703     | 143   | -16.03 | (1)  |
| mmu-miR-1968*   | 143   | -17.08 | (1)  |
| mmu-miR-3103    | 142   | -9.84  | (1)  |
| mmu-miR-340-3p  | 142   | -26.74 | (1)  |
| mmu-miR-469     | 142   | -21.41 | (1)  |
| mmu-miR-669n    | 142   | -9.11  | (1)  |
| mmu-miR-592     | 142   | -9.63  | (1)  |
| mmu-miR-1224    | 142   | -20.22 | (1)  |
| mmu-miR-653     | 142   | -11.44 | (1)  |
| mmu-miR-380-5p  | 140   | -10.7  | (1)  |
| mmu-miR-758*    | 140   | -22.04 | (1)  |
| mmu-miR-1224*   | 140   | -21.71 | (1)  |
| mmu-miR-1905    | 140   | -13.72 | (1)  |
| mmu-miR-1-1*    | 140   | -20.49 | (1)  |
| mmu-miR-3064-5p | 140   | -20.85 | (1)  |

Conservation was evaluated using the Mammal Cons phastCons30wayPlacental.

(1) miRNAs not expressed in muscle (see Extended Experimental Procedures).

(2) miRNA whose targets are not expressed in muscle or do not have a known function in muscle physiology (see Extended Experimental Procedures).
